# Supplementary material for: Comparison of tetrel bonds in neutral and protonated complexes of pyridineTF3and furanTF3(T = C, Si, and Ge) with NH3
Source: Royal Society of Chemistry journal article supplement (doi:10.1039/c6cp07531b), 2017-01-01
Supplement: c6cp07531b1.pdf [file c6cp07531b1.pdf]

## Supporting Information

**Table S1** The most positive MEPs on the  $\sigma$ -hole of tetrel atom ( $V_{\max}$ , kcal/mol) in the neutral monomers

|                                 | $V_{\max,1}$ | $V_{\max,2}$ | $V_{\max,3}$ | $V_{\max,4}$ |
|---------------------------------|--------------|--------------|--------------|--------------|
| <i>p</i> -PyCF <sub>3</sub>     | 10.58        | 20.49        | 20.48        | ---          |
| <i>p</i> -PySiF <sub>3</sub>    | 41.56        | 42.25        | 42.23        | 48.38        |
| <i>p</i> -PyGeF <sub>3</sub>    | 41.57        | 47.62        | 55.62        | 55.64        |
| <i>p</i> -PySiCl <sub>3</sub>   | 22.17        | 23.42        | 25.58        | 25.51        |
| <i>o</i> -PySiF <sub>3</sub>    | 34.86        | 34.86        | 35.67        | 21.89        |
| <i>m</i> -PySiF <sub>3</sub>    | 39.43        | 35.67        | 44.86        | 46.55        |
| $\alpha$ -furanCF <sub>3</sub>  | 7.38         | 10.93        | 10.93        | 4.97         |
| $\alpha$ -furanSiF <sub>3</sub> | 37.96        | 31.31        | 31.31        | 43.82        |
| $\alpha$ -furanGeF <sub>3</sub> | 38.96        | 34.82        | 34.81        | 45.91        |
| $\beta$ -furanCF <sub>3</sub>   | 5.91         | 10.43        | 10.38        | 21.67        |
| $\beta$ -furanSiF <sub>3</sub>  | 36.21        | 32.27        | 32.29        | 50.25        |
| $\beta$ -furanGeF <sub>3</sub>  | 36.61        | 40.31        | 40.30        | 58.91        |

**Table S2** Change of T–X (T = C, Si, and Ge; X = F and Cl) bond length ( $\Delta r$ , Å) in the neutral complexes relative to the isolated molecules

|                                                               | $\Delta r_1$ | $\Delta r_2$ | $\Delta r_3$ |
|---------------------------------------------------------------|--------------|--------------|--------------|
| <i>p</i> -PyCF <sub>3</sub> ⋯NH <sub>3</sub> ( <b>1</b> )     | -0.001       | 0.005        | 0.000        |
| <i>p</i> -PySiF <sub>3</sub> ⋯NH <sub>3</sub> ( <b>2</b> )    | 0.037        | 0.036        | 0.036        |
| <i>p</i> -PyGeF <sub>3</sub> ⋯NH <sub>3</sub> ( <b>3</b> )    | 0.047        | 0.044        | 0.044        |
| <i>p</i> -PySiCl <sub>3</sub> ⋯NH <sub>3</sub> ( <b>4</b> )   | 0.064        | 0.071        | 0.071        |
| <i>o</i> -PySiF <sub>3</sub> ⋯NH <sub>3</sub> ( <b>5</b> )    | 0.036        | 0.034        | 0.034        |
| <i>m</i> -PySiF <sub>3</sub> ⋯NH <sub>3</sub> ( <b>6</b> )    | 0.037        | 0.036        | 0.035        |
| $\alpha$ -furanCF <sub>3</sub> ⋯NH <sub>3</sub> ( <b>7</b> )  | -0.004       | 0.003        | 0.003        |
| $\alpha$ -furanSiF <sub>3</sub> ⋯NH <sub>3</sub> ( <b>8</b> ) | 0.038        | 0.034        | 0.034        |
| $\alpha$ -furanGeF <sub>3</sub> ⋯NH <sub>3</sub> ( <b>9</b> ) | 0.046        | 0.041        | 0.041        |
| $\beta$ -furanCF <sub>3</sub> ⋯NH <sub>3</sub> ( <b>10</b> )  | -0.002       | 0.004        | 0.000        |
| $\beta$ -furanSiF <sub>3</sub> ⋯NH <sub>3</sub> ( <b>11</b> ) | 0.037        | 0.034        | 0.034        |
| $\beta$ -furanGeF <sub>3</sub> ⋯NH <sub>3</sub> ( <b>12</b> ) | 0.047        | 0.043        | 0.042        |

**Table S3** Electrostatic energy ( $E^{\text{ele}}$ ), exchange energy ( $E^{\text{ex}}$ ), repulsion energy ( $E^{\text{rep}}$ ), polarization energy ( $E^{\text{pol}}$ ), dispersion energy ( $E^{\text{disp}}$ ), and binding energy ( $E_{\text{b}}$ ) in the neutral complexes. All are in kcal/mol

|                                                               | $E^{\text{ele}}$ | $E^{\text{ex}}$ | $E^{\text{rep}}$ | $E^{\text{pol}}$ | $E^{\text{disp}}$ | $E_{\text{b}}$ |
|---------------------------------------------------------------|------------------|-----------------|------------------|------------------|-------------------|----------------|
| <i>p</i> -PyCF <sub>3</sub> ⋯NH <sub>3</sub> ( <b>1</b> )     | -0.56            | -2.50           | 4.28             | -0.26            | -1.79             | -0.83          |
| <i>p</i> -PySiF <sub>3</sub> ⋯NH <sub>3</sub> ( <b>2</b> )    | -74.80           | -82.17          | 168.31           | -36.46           | -1.35             | -26.47         |
| <i>p</i> -PyGeF <sub>3</sub> ⋯NH <sub>3</sub> ( <b>3</b> )    | -86.21           | -88.27          | 185.48           | -39.53           | 0.17              | -28.36         |
| <i>p</i> -PySiCl <sub>3</sub> ⋯NH <sub>3</sub> ( <b>4</b> )   | -93.31           | -134.98         | 267.95           | -56.80           | -8.57             | -25.71         |
| <i>o</i> -PySiF <sub>3</sub> ⋯NH <sub>3</sub> ( <b>5</b> )    | -72.84           | -81.10          | 165.56           | -34.87           | -1.44             | -24.69         |
| <i>m</i> -PySiF <sub>3</sub> ⋯NH <sub>3</sub> ( <b>6</b> )    | -74.34           | -82.08          | 167.95           | -36.04           | -1.65             | -26.16         |
| $\alpha$ -furanCF <sub>3</sub> ⋯NH <sub>3</sub> ( <b>7</b> )  | -1.04            | -2.04           | 3.51             | -0.17            | -1.26             | -1.00          |
| $\alpha$ -furanSiF <sub>3</sub> ⋯NH <sub>3</sub> ( <b>8</b> ) | -75.02           | -82.58          | 169.17           | -36.52           | -1.39             | -26.34         |
| $\alpha$ -furanGeF <sub>3</sub> ⋯NH <sub>3</sub> ( <b>9</b> ) | -85.95           | -88.15          | 185.2            | -39.14           | 0.07              | -27.97         |
| $\beta$ -furanCF <sub>3</sub> ⋯NH <sub>3</sub> ( <b>10</b> )  | -1.11            | -2.99           | 5.12             | -0.33            | -1.82             | -1.12          |
| $\beta$ -furanSiF <sub>3</sub> ⋯NH <sub>3</sub> ( <b>11</b> ) | -71.62           | -80.21          | 163.45           | -33.95           | -1.63             | -23.96         |
| $\beta$ -furanGeF <sub>3</sub> ⋯NH <sub>3</sub> ( <b>12</b> ) | -84.44           | -87.55          | 183.37           | -38.14           | -0.04             | -26.81         |

**Table S4** The most positive MEPs on the  $\sigma$ -hole of tetrel atom ( $V_{\text{max}}$ , kcal/mol) in the protonated monomers

|                                                  | $V_{\text{max},1}$ | $V_{\text{max},2}$ | $V_{\text{max},3}$ | $V_{\text{max},4}$ |
|--------------------------------------------------|--------------------|--------------------|--------------------|--------------------|
| H <sup>+</sup> - <i>p</i> -PyCF <sub>3</sub>     | 85.81(75.23)       | 114.44             | 114.35             | ---                |
| H <sup>+</sup> - <i>p</i> -PySiF <sub>3</sub>    | 126.03(84.47)      | 128.93             | 128.93             | 132.38             |
| H <sup>+</sup> - <i>p</i> -PyGeF <sub>3</sub>    | 129.00(87.43)      | 134.75             | 134.64             | 142.13             |
| H <sup>+</sup> - <i>p</i> -PySiCl <sub>3</sub>   | 92.98(70.81)       | 107.98             | 108.00             | ---                |
| H <sup>+</sup> - <i>o</i> -PySiF <sub>3</sub>    | 138.50(103.64)     | 139.92             | 139.92             | 145.61             |
| H <sup>+</sup> - <i>m</i> -PySiF <sub>3</sub>    | 126.62(87.19)      | 125.64             | 125.59             | 134.26             |
| H <sup>+</sup> - $\alpha$ -furanCF <sub>3</sub>  | 100.38(93.0)       | 123.24             | ---                | ---                |
| H <sup>+</sup> - $\alpha$ -furanSiF <sub>3</sub> | 144.27(106.31)     | 136.42             | 146.62             | 153.90             |
| H <sup>+</sup> - $\alpha$ -furanGeF <sub>3</sub> | 150.57(111.61)     | 143.58             | 149.50             | 167.17             |
| H <sup>+</sup> - $\beta$ -furanCF                | 88.86(82.95)       | 110.95             | 110.41             | 119.50             |
| H <sup>+</sup> - $\beta$ -furanSiF <sub>3</sub>  | 130.12(93.91)      | 125.89             | 126.13             | 143.43             |
| H <sup>+</sup> - $\beta$ -furanGeF <sub>3</sub>  | 133.99 (97.38)     | 132.28             | 132.57             | 151.15             |

Note: Data in parentheses are the difference of  $V_{\text{max},1}$  in the protonated molecule relative to the neutral analogue.

**Table S5** Charge transfer (CT, e) and change of charge ( $\Delta q$ , e) on the  $-TX_3$  group in the hydrogen-bonded complexes at the WB97XD/aug-cc-pVDZ level.

|                                                   | CT    | $\Delta q$      |
|---------------------------------------------------|-------|-----------------|
| $H_3N\cdots H^+ -p\text{-PyCF}_3$ ( <b>13</b> )   | 0.130 | -0.0122 (0.102) |
| $H_3N\cdots H^+ -p\text{-PySiF}_3$ ( <b>14</b> )  | 0.127 | -0.0120 (0.576) |
| $H_3N\cdots H^+ -p\text{-PyGeF}_3$ ( <b>15</b> )  | 0.133 | -0.0146 (0.531) |
| $H_3N\cdots H^+ -p\text{-PySiCl}_3$ ( <b>16</b> ) | 0.122 | -0.0148 (0.547) |
| $H_3N\cdots H^+ -o\text{-PySiF}_3$ ( <b>17</b> )  | 0.132 | -0.0267 (0.572) |
| $H_3N\cdots H^+ -m\text{-PySiF}_3$ ( <b>18</b> )  | 0.128 | -0.0138 (0.574) |

Note: The data in parentheses are the charge on the  $-TX_3$  group in the protonated molecule.

**Table S6** Electron density ( $\rho$ ), Laplacian ( $\nabla^2\rho$ ) and energy density ( $H$ ) at the  $N\cdots H$  BCP in the hydrogen-bonded complexes. All are in au.

|                                                   | $\rho$ | $\nabla^2\rho$ | $H$    |
|---------------------------------------------------|--------|----------------|--------|
| $H_3N\cdots H^+ -p\text{-PyCF}_3$ ( <b>13</b> )   | 0.064  | 0.067          | -0.024 |
| $H_3N\cdots H^+ -p\text{-PySiF}_3$ ( <b>14</b> )  | 0.062  | 0.070          | -0.022 |
| $H_3N\cdots H^+ -p\text{-PyGeF}_3$ ( <b>15</b> )  | 0.064  | 0.067          | -0.024 |
| $H_3N\cdots H^+ -p\text{-PySiCl}_3$ ( <b>16</b> ) | 0.060  | 0.073          | -0.020 |
| $H_3N\cdots H^+ -o\text{-PySiF}_3$ ( <b>17</b> )  | 0.064  | 0.069          | -0.023 |
| $H_3N\cdots H^+ -m\text{-PySiF}_3$ ( <b>18</b> )  | 0.062  | 0.070          | -0.022 |

**Table S7** Electrostatic energy ( $E^{\text{ele}}$ ), exchange energy ( $E^{\text{ex}}$ ), repulsion energy ( $E^{\text{rep}}$ ), polarization energy ( $E^{\text{pol}}$ ), and dispersion energy ( $E^{\text{disp}}$ ) in the hydrogen-bonded complexes. All are in kcal/mol

|                                                   | $E^{\text{ele}}$ | $E^{\text{ex}}$ | $E^{\text{rep}}$ | $E^{\text{pol}}$ | $E^{\text{disp}}$ |
|---------------------------------------------------|------------------|-----------------|------------------|------------------|-------------------|
| $H_3N\cdots H^+ -p\text{-PyCF}_3$ ( <b>13</b> )   | -32.53           | -34.12          | 66.37            | -19.31           | -4.84             |
| $H_3N\cdots H^+ -p\text{-PySiF}_3$ ( <b>14</b> )  | -31.95           | -33.51          | 65.08            | -18.70           | -4.83             |
| $H_3N\cdots H^+ -p\text{-PyGeF}_3$ ( <b>15</b> )  | -33.00           | -34.84          | 67.84            | -19.89           | -4.60             |
| $H_3N\cdots H^+ -p\text{-PySiCl}_3$ ( <b>16</b> ) | -30.80           | -32.33          | 62.60            | -17.54           | -4.82             |
| $H_3N\cdots H^+ -o\text{-PySiF}_3$ ( <b>17</b> )  | -34.59           | -37.58          | 72.53            | -20.10           | -5.87             |
| $H_3N\cdots H^+ -m\text{-PySiF}_3$ ( <b>18</b> )  | -32.00           | -33.72          | 65.46            | -18.74           | -4.91             |

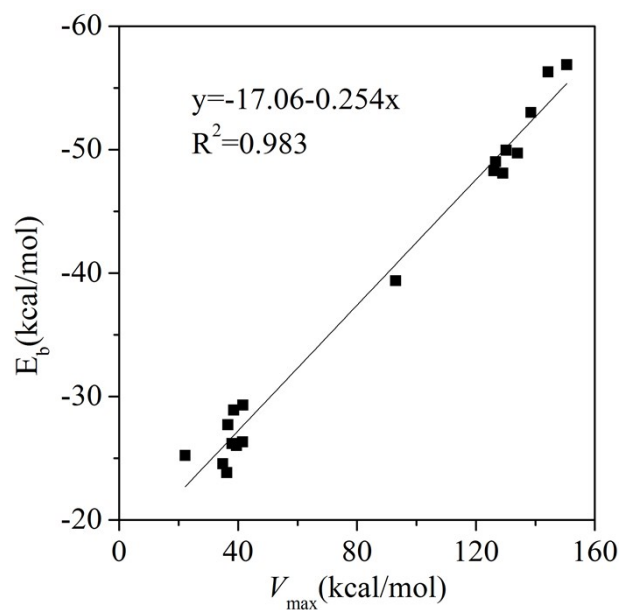

**Fig. S1** Binding energy ( $E_b$ ) versus the most positive MEP ( $V_{\max}$ ) on the C–T (T = Si and Ge) end in the neutral and protonated molecules

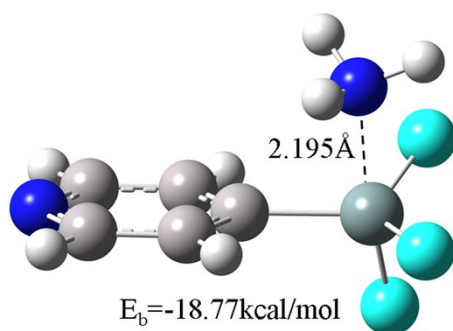

**Fig. S2** Optimized structure of another complex between *p*-PySiF<sub>3</sub> and NH<sub>3</sub>.

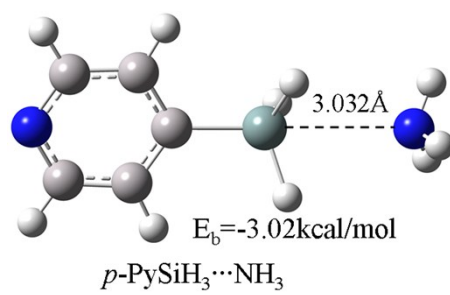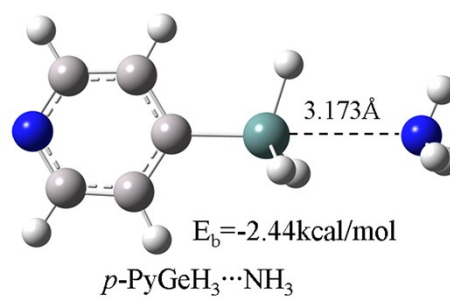

**Fig. S3** Optimized structure of complex between  $p\text{-PyTH}_3$  and  $\text{NH}_3$

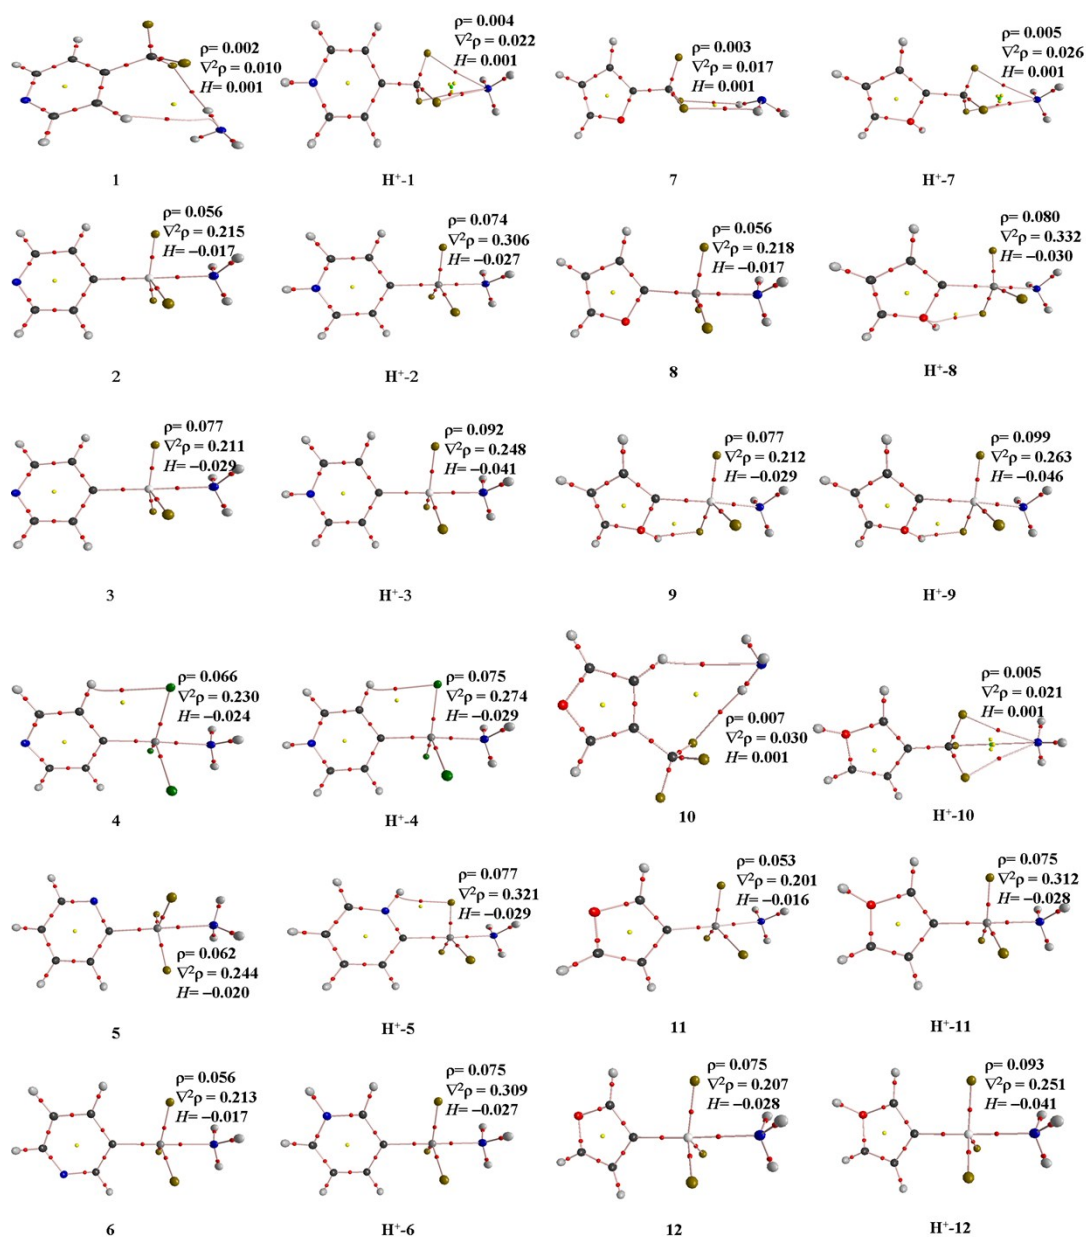

**Fig. S4** Molecular maps of the neutral and the protonated complexes with the electron density ( $\rho$ , au), Laplacian ( $\nabla^2\rho$ , au) and energy density ( $H$ , au) at the intermolecular bond critical point

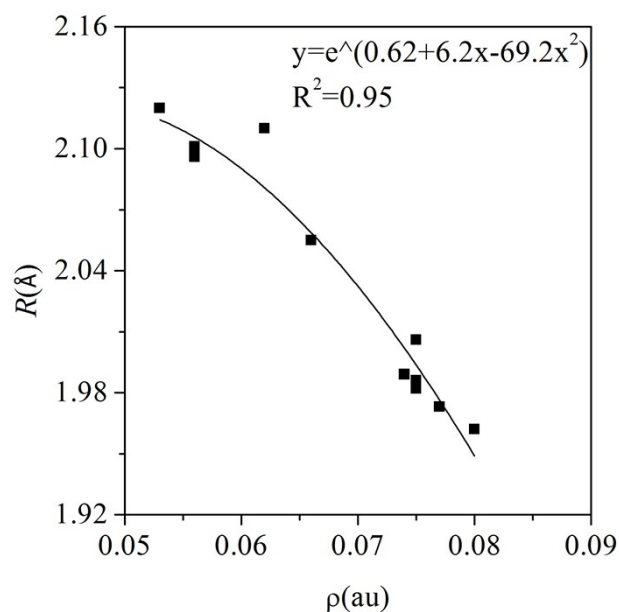

**Fig. S5** Binding distance ( $R$ ) versus electron density ( $\rho$ ) at the Si...N BCP in the tetrel bond

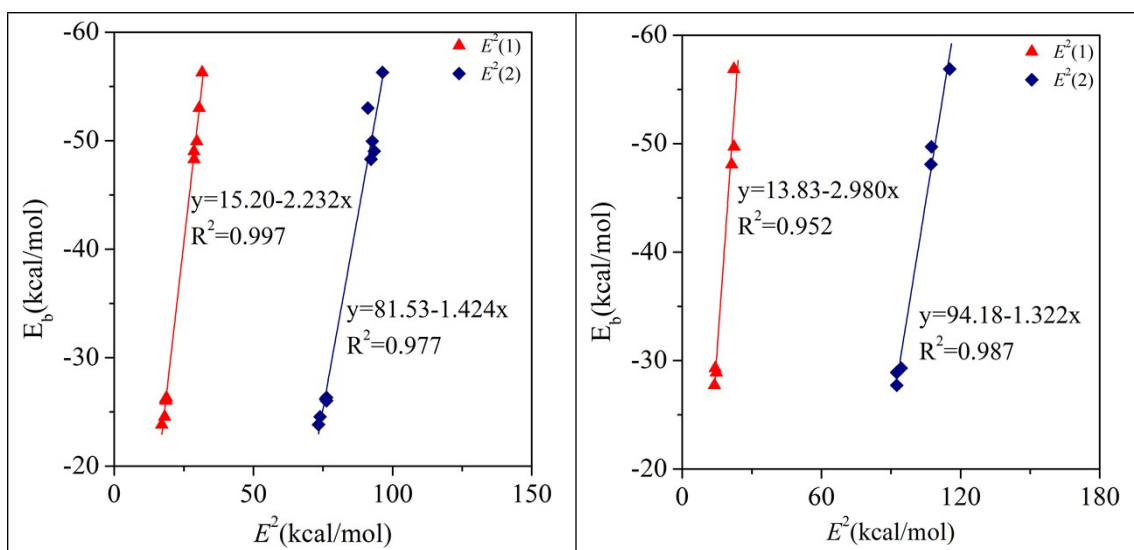

**Fig. S6** Binding energy ( $E_b$ ) versus second-order perturbation energies ( $E^2$ ) due to the orbital interactions of  $Lp_N \rightarrow BD^*_{C-T}$  (1) and  $Lp_N \rightarrow BD^*_{T-X}$  (2) in the neutral and protonated complexes of furanTF<sub>3</sub> and PyTF<sub>3</sub> (T = Si (left) and Ge (right))

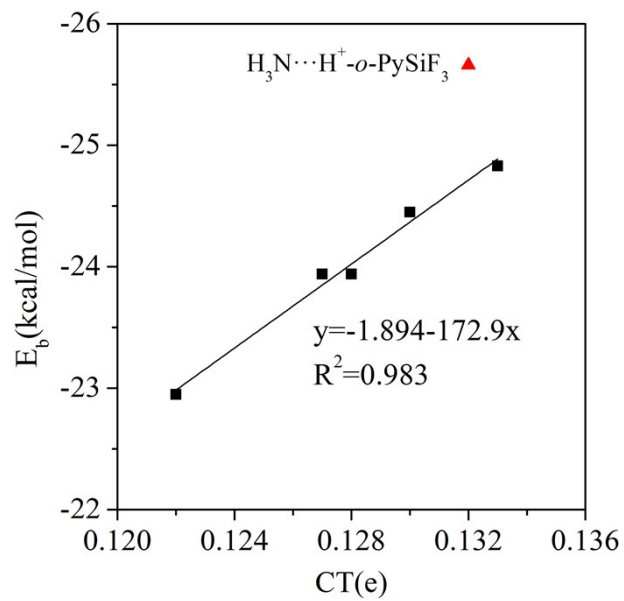

**Fig. S7** Binding energy ( $E_b$ ) versus charge transfer (CT) in the hydrogen-bonded complexes
